# Supplementary material for: On Evaluating MHC-II Binding Peptide Prediction Methods
Source: PubMed Central journal article supplement (PMC2533399; doi:10.1371/journal.pone.0003268), 2008-09-24
Supplement: pone.0003268.s001.pdf [file pone.0003268.s001.pdf]

**Supplementary Materials**  
**On Evaluating MHC-II Binding Peptide Prediction Methods**

Table S1: Performance of CTD method on MHCPEP-UPDS datasets using 5-fold cross-validation test. Last column refers to the number of binding peptides. For each dataset an equal number of non-binding peptide is generated randomly form Swissprot sequences (see Methods section for details).

| allele   | ACC   | Sn    | Sp     | CC    | AUC   | N    |
|----------|-------|-------|--------|-------|-------|------|
| HLA-DQ2  | 88.05 | 81.42 | 94.69  | 0.768 | 0.939 | 113  |
| HLA-DQ4  | 86.60 | 91.75 | 81.44  | 0.736 | 0.934 | 97   |
| HLA-DQ7  | 80.00 | 80.00 | 80.00  | 0.600 | 0.853 | 135  |
| HLA-DR1  | 81.29 | 76.10 | 86.49  | 0.629 | 0.863 | 703  |
| HLA-DR2  | 79.05 | 72.38 | 85.71  | 0.586 | 0.829 | 315  |
| HLA-DR3  | 83.85 | 73.96 | 93.75  | 0.691 | 0.862 | 192  |
| HLA-DR4  | 86.59 | 73.36 | 99.82  | 0.759 | 0.906 | 1085 |
| HLA-DR5  | 82.01 | 64.02 | 100.00 | 0.686 | 0.887 | 189  |
| HLA-DR7  | 87.10 | 80.35 | 93.84  | 0.749 | 0.904 | 341  |
| HLA-DR8  | 86.00 | 79.20 | 92.80  | 0.727 | 0.903 | 125  |
| HLA-DR9  | 86.17 | 75.53 | 96.81  | 0.740 | 0.913 | 94   |
| HLA-DR11 | 91.65 | 90.70 | 92.60  | 0.833 | 0.958 | 473  |
| HLA-DR13 | 87.60 | 77.69 | 97.52  | 0.767 | 0.920 | 121  |
| HLA-DR15 | 83.06 | 73.55 | 92.56  | 0.673 | 0.867 | 121  |
| HLA-DR17 | 90.82 | 86.08 | 95.57  | 0.820 | 0.934 | 158  |
| HLA-DR51 | 83.91 | 75.65 | 92.17  | 0.688 | 0.886 | 115  |
| I-Ab     | 81.99 | 72.79 | 91.18  | 0.651 | 0.875 | 136  |
| I-Ad     | 86.27 | 79.52 | 93.01  | 0.732 | 0.902 | 415  |
| I-Ag7    | 82.80 | 76.43 | 89.17  | 0.661 | 0.887 | 157  |
| I-Ak     | 83.66 | 76.77 | 90.55  | 0.680 | 0.881 | 254  |
| I-Ed     | 88.61 | 83.33 | 93.88  | 0.776 | 0.936 | 294  |
| I-Ek     | 89.82 | 84.13 | 95.51  | 0.802 | 0.951 | 334  |

Table S2: Performance of CTD method on MHCPEP-SRDS1 datasets using 5-fold cross-validation test. Last column refers to the number of binding peptides. For each dataset an equal number of non-binding peptide is generated randomly from Swissprot sequences (see Methods section for details).

| allele   | ACC   | Sn    | Sp     | CC    | AUC   | N   |
|----------|-------|-------|--------|-------|-------|-----|
| HLA-DQ2  | 82.09 | 79.10 | 85.07  | 0.643 | 0.853 | 67  |
| HLA-DQ4  | 81.55 | 80.95 | 82.14  | 0.631 | 0.881 | 84  |
| HLA-DQ7  | 69.86 | 61.64 | 78.08  | 0.403 | 0.726 | 73  |
| HLA-DR1  | 70.83 | 64.58 | 77.08  | 0.420 | 0.744 | 336 |
| HLA-DR2  | 71.96 | 69.59 | 74.32  | 0.440 | 0.781 | 148 |
| HLA-DR3  | 59.88 | 19.75 | 100.00 | 0.331 | 0.572 | 81  |
| HLA-DR4  | 69.93 | 66.06 | 73.80  | 0.400 | 0.723 | 439 |
| HLA-DR5  | 71.20 | 65.22 | 77.17  | 0.427 | 0.784 | 92  |
| HLA-DR7  | 69.34 | 66.42 | 72.26  | 0.388 | 0.732 | 137 |
| HLA-DR8  | 68.09 | 68.09 | 68.09  | 0.362 | 0.694 | 47  |
| HLA-DR9  | 71.95 | 68.29 | 75.61  | 0.440 | 0.721 | 41  |
| HLA-DR11 | 83.13 | 79.38 | 86.88  | 0.664 | 0.890 | 160 |
| HLA-DR13 | 78.68 | 79.41 | 77.94  | 0.574 | 0.837 | 68  |
| HLA-DR15 | 66.67 | 68.75 | 64.58  | 0.334 | 0.667 | 48  |
| HLA-DR17 | 82.32 | 71.95 | 92.68  | 0.661 | 0.876 | 82  |
| HLA-DR51 | 61.11 | 44.44 | 77.78  | 0.236 | 0.603 | 45  |
| I-Ab     | 62.10 | 62.90 | 61.29  | 0.242 | 0.680 | 62  |
| I-Ad     | 75.30 | 76.19 | 74.40  | 0.506 | 0.804 | 168 |
| I-Ag7    | 66.94 | 58.06 | 75.81  | 0.344 | 0.702 | 62  |
| I-Ak     | 71.35 | 72.92 | 69.79  | 0.427 | 0.796 | 96  |
| I-Ed     | 90.16 | 84.57 | 95.74  | 0.808 | 0.932 | 188 |
| I-Ek     | 86.76 | 87.25 | 86.27  | 0.735 | 0.941 | 204 |

Table S3: Performance of CTD method on MHCPEP-SRDS2 datasets using 5-fold cross-validation test. Last column refers to the number of binding peptides. For each dataset an equal number of non-binding peptide is generated randomly from Swissprot sequences (see Methods section for details).

| allele   | ACC   | Sn    | Sp    | CC    | AUC   | N   |
|----------|-------|-------|-------|-------|-------|-----|
| HLA-DQ2  | 64.06 | 53.13 | 75.00 | 0.288 | 0.573 | 32  |
| HLA-DQ4  | 86.08 | 86.08 | 86.08 | 0.722 | 0.817 | 79  |
| HLA-DQ7  | 66.15 | 67.69 | 64.62 | 0.323 | 0.709 | 65  |
| HLA-DR1  | 64.67 | 64.46 | 64.88 | 0.293 | 0.711 | 242 |
| HLA-DR2  | 60.58 | 57.69 | 63.46 | 0.212 | 0.614 | 104 |
| HLA-DR3  | 57.97 | 55.07 | 60.87 | 0.160 | 0.572 | 69  |
| HLA-DR4  | 64.77 | 60.40 | 69.13 | 0.296 | 0.692 | 298 |
| HLA-DR5  | 64.75 | 70.49 | 59.02 | 0.297 | 0.625 | 61  |
| HLA-DR7  | 57.47 | 57.47 | 57.47 | 0.149 | 0.599 | 87  |
| HLA-DR8  | 63.04 | 60.87 | 65.22 | 0.261 | 0.680 | 46  |
| HLA-DR9  | 67.65 | 55.88 | 79.41 | 0.363 | 0.690 | 34  |
| HLA-DR11 | 74.00 | 75.00 | 73.00 | 0.480 | 0.792 | 100 |
| HLA-DR13 | 60.29 | 58.82 | 61.76 | 0.206 | 0.587 | 34  |
| HLA-DR15 | 68.06 | 72.22 | 63.89 | 0.362 | 0.689 | 36  |
| HLA-DR17 | 53.75 | 50.00 | 57.50 | 0.075 | 0.550 | 40  |
| HLA-DR51 | 60.26 | 66.67 | 53.85 | 0.207 | 0.595 | 39  |
| I-Ab     | 62.75 | 62.75 | 62.75 | 0.255 | 0.638 | 51  |
| I-Ad     | 57.92 | 58.42 | 57.43 | 0.158 | 0.618 | 101 |
| I-Ag7    | 66.98 | 64.15 | 69.81 | 0.340 | 0.632 | 53  |
| I-Ak     | 63.43 | 62.69 | 64.18 | 0.269 | 0.661 | 67  |
| I-Ed     | 68.75 | 71.43 | 66.07 | 0.376 | 0.744 | 56  |
| I-Ek     | 68.75 | 70.31 | 67.19 | 0.375 | 0.703 | 64  |

Table S4: Performance of CTD method on MHCPEP-SRDS3 datasets using 5-fold cross-validation test. Last column refers to the number of binding peptides. For each dataset an equal number of non-binding peptide is generated randomly from Swissprot sequences (see Methods section for details).

| allele   | ACC   | Sn    | Sp    | CC    | AUC   | N   |
|----------|-------|-------|-------|-------|-------|-----|
| HLA-DQ2  | 75.64 | 71.79 | 79.49 | 0.514 | 0.754 | 39  |
| HLA-DQ4  | 84.15 | 90.24 | 78.05 | 0.688 | 0.900 | 82  |
| HLA-DQ7  | 64.67 | 60.00 | 69.33 | 0.295 | 0.706 | 75  |
| HLA-DR1  | 66.37 | 67.63 | 65.11 | 0.327 | 0.720 | 278 |
| HLA-DR2  | 64.18 | 59.70 | 68.66 | 0.285 | 0.686 | 134 |
| HLA-DR3  | 56.16 | 50.68 | 61.64 | 0.124 | 0.532 | 73  |
| HLA-DR4  | 65.01 | 61.47 | 68.56 | 0.301 | 0.695 | 353 |
| HLA-DR5  | 60.00 | 64.00 | 56.00 | 0.201 | 0.617 | 75  |
| HLA-DR7  | 60.40 | 59.41 | 61.39 | 0.208 | 0.613 | 101 |
| HLA-DR8  | 66.67 | 62.96 | 70.37 | 0.334 | 0.714 | 54  |
| HLA-DR9  | 74.32 | 75.68 | 72.97 | 0.487 | 0.792 | 37  |
| HLA-DR11 | 79.61 | 79.61 | 79.61 | 0.592 | 0.850 | 103 |
| HLA-DR13 | 61.11 | 63.89 | 58.33 | 0.223 | 0.630 | 36  |
| HLA-DR15 | 66.33 | 65.31 | 67.35 | 0.327 | 0.663 | 49  |
| HLA-DR17 | 67.78 | 71.11 | 64.44 | 0.356 | 0.682 | 45  |
| HLA-DR51 | 64.55 | 67.27 | 61.82 | 0.291 | 0.672 | 55  |
| I-Ab     | 61.48 | 54.10 | 68.85 | 0.232 | 0.618 | 61  |
| I-Ad     | 65.56 | 65.93 | 65.19 | 0.311 | 0.676 | 135 |
| I-Ag7    | 69.75 | 58.02 | 81.48 | 0.406 | 0.757 | 81  |
| I-Ak     | 65.29 | 62.35 | 68.24 | 0.306 | 0.691 | 85  |
| I-Ed     | 73.03 | 73.68 | 72.37 | 0.461 | 0.787 | 76  |
| I-Ek     | 70.51 | 65.38 | 75.64 | 0.412 | 0.699 | 78  |

Table S5: Performance of CTD method on MHCPEP-WUPDS datasets using 5-fold cross-validation test. Each dataset is obtained by applying the peptide weighting procedure separately to the binders and non-binders in the corresponding MHCPEP-UPDS dataset (see Methods section for details).

| allele   | ACC   | Sn    | Sp     | CC    | AUC   |
|----------|-------|-------|--------|-------|-------|
| HLA-DQ2  | 85.65 | 33.32 | 100.00 | 0.531 | 0.772 |
| HLA-DQ4  | 86.00 | 87.80 | 84.54  | 0.720 | 0.925 |
| HLA-DQ7  | 76.74 | 71.51 | 79.26  | 0.492 | 0.812 |
| HLA-DR1  | 80.98 | 36.61 | 93.60  | 0.372 | 0.699 |
| HLA-DR2  | 77.86 | 12.67 | 100.00 | 0.313 | 0.617 |
| HLA-DR3  | 77.55 | 17.67 | 100.00 | 0.367 | 0.614 |
| HLA-DR4  | 85.41 | 31.98 | 99.91  | 0.516 | 0.730 |
| HLA-DR5  | 80.16 | 25.32 | 100.00 | 0.447 | 0.733 |
| HLA-DR7  | 84.54 | 23.92 | 100.00 | 0.448 | 0.632 |
| HLA-DR8  | 87.67 | 53.42 | 100.00 | 0.676 | 0.802 |
| HLA-DR9  | 95.67 | 44.75 | 100.00 | 0.654 | 0.738 |
| HLA-DR11 | 89.47 | 54.88 | 96.82  | 0.600 | 0.830 |
| HLA-DR13 | 82.49 | 20.71 | 100.00 | 0.411 | 0.605 |
| HLA-DR15 | 80.02 | 19.58 | 100.00 | 0.393 | 0.587 |
| HLA-DR17 | 88.17 | 42.56 | 100.00 | 0.609 | 0.679 |
| HLA-DR51 | 82.95 | 35.12 | 100.00 | 0.534 | 0.718 |
| I-Ab     | 78.59 | 25.41 | 98.53  | 0.393 | 0.636 |
| I-Ad     | 85.60 | 37.62 | 98.31  | 0.506 | 0.707 |
| I-Ag7    | 80.93 | 26.51 | 100.00 | 0.459 | 0.700 |
| I-Ak     | 84.18 | 23.29 | 100.00 | 0.441 | 0.680 |
| I-Ed     | 88.93 | 17.18 | 97.31  | 0.221 | 0.805 |
| I-Ek     | 88.93 | 17.18 | 97.31  | 0.221 | 0.805 |

Table S6: Performance of LA method on MHCPEP-UPDS datasets using 5-fold cross-validation test. Last column refers to the number of binding peptides. For each dataset an equal number of non-binding peptide is generated randomly from Swissprot sequences (see Methods section for details).

| allele   | ACC   | Sn    | Sp    | CC    | AUC   | N    |
|----------|-------|-------|-------|-------|-------|------|
| HLA-DQ2  | 82.30 | 80.53 | 84.07 | 0.646 | 0.905 | 113  |
| HLA-DQ4  | 79.38 | 74.23 | 84.54 | 0.591 | 0.903 | 97   |
| HLA-DQ7  | 75.19 | 74.07 | 76.30 | 0.504 | 0.860 | 135  |
| HLA-DR1  | 80.30 | 73.68 | 86.91 | 0.611 | 0.872 | 703  |
| HLA-DR2  | 78.41 | 73.02 | 83.81 | 0.572 | 0.866 | 315  |
| HLA-DR3  | 77.86 | 75.52 | 80.21 | 0.558 | 0.869 | 192  |
| HLA-DR4  | 77.10 | 71.71 | 82.49 | 0.545 | 0.862 | 1085 |
| HLA-DR5  | 80.16 | 75.13 | 85.19 | 0.606 | 0.864 | 189  |
| HLA-DR7  | 79.18 | 72.73 | 85.63 | 0.588 | 0.858 | 341  |
| HLA-DR8  | 83.60 | 80.80 | 86.40 | 0.673 | 0.896 | 125  |
| HLA-DR9  | 79.79 | 77.66 | 81.91 | 0.596 | 0.880 | 94   |
| HLA-DR11 | 86.68 | 80.34 | 93.02 | 0.740 | 0.938 | 473  |
| HLA-DR13 | 80.99 | 74.38 | 87.60 | 0.625 | 0.905 | 121  |
| HLA-DR15 | 77.69 | 74.38 | 80.99 | 0.555 | 0.829 | 121  |
| HLA-DR17 | 83.86 | 79.75 | 87.97 | 0.680 | 0.907 | 158  |
| HLA-DR51 | 80.87 | 79.13 | 82.61 | 0.618 | 0.891 | 115  |
| I-Ab     | 78.68 | 77.21 | 80.15 | 0.574 | 0.855 | 136  |
| I-Ad     | 81.81 | 75.42 | 88.19 | 0.641 | 0.898 | 415  |
| I-Ag7    | 79.94 | 77.71 | 82.17 | 0.599 | 0.896 | 157  |
| I-Ak     | 80.12 | 76.38 | 83.86 | 0.604 | 0.872 | 254  |
| I-Ed     | 83.84 | 77.21 | 90.48 | 0.683 | 0.921 | 294  |
| I-Ek     | 86.53 | 81.74 | 91.32 | 0.734 | 0.940 | 334  |

Table S7: Performance of LA method on MHCPEP-SRDS1 datasets using 5-fold cross-validation test. Last column refers to the number of binding peptides. For each dataset an equal number of non-binding peptide is generated randomly from Swissprot sequences (see Methods section for details).

| allele   | ACC   | Sn    | Sp    | CC    | AUC   | N   |
|----------|-------|-------|-------|-------|-------|-----|
| HLA-DQ2  | 73.88 | 76.12 | 71.64 | 0.478 | 0.852 | 67  |
| HLA-DQ4  | 78.57 | 72.62 | 84.52 | 0.576 | 0.854 | 84  |
| HLA-DQ7  | 71.23 | 68.49 | 73.97 | 0.425 | 0.799 | 73  |
| HLA-DR1  | 72.02 | 66.37 | 77.68 | 0.443 | 0.801 | 336 |
| HLA-DR2  | 71.28 | 70.95 | 71.62 | 0.426 | 0.795 | 148 |
| HLA-DR3  | 60.49 | 61.73 | 59.26 | 0.210 | 0.678 | 81  |
| HLA-DR4  | 68.56 | 63.78 | 73.35 | 0.373 | 0.751 | 439 |
| HLA-DR5  | 70.65 | 70.65 | 70.65 | 0.413 | 0.776 | 92  |
| HLA-DR7  | 62.77 | 62.77 | 62.77 | 0.255 | 0.702 | 137 |
| HLA-DR8  | 57.45 | 38.30 | 76.60 | 0.161 | 0.625 | 47  |
| HLA-DR9  | 63.41 | 75.61 | 51.22 | 0.277 | 0.746 | 41  |
| HLA-DR11 | 82.81 | 80.63 | 85.00 | 0.657 | 0.912 | 160 |
| HLA-DR13 | 72.06 | 75.00 | 69.12 | 0.442 | 0.827 | 68  |
| HLA-DR15 | 62.50 | 66.67 | 58.33 | 0.251 | 0.718 | 48  |
| HLA-DR17 | 72.56 | 74.39 | 70.73 | 0.452 | 0.806 | 82  |
| HLA-DR51 | 65.56 | 75.56 | 55.56 | 0.318 | 0.788 | 45  |
| I-Ab     | 66.94 | 54.84 | 79.03 | 0.349 | 0.705 | 62  |
| I-Ad     | 72.32 | 69.64 | 75.00 | 0.447 | 0.818 | 168 |
| I-Ag7    | 74.19 | 70.97 | 77.42 | 0.485 | 0.778 | 62  |
| I-Ak     | 75.00 | 76.04 | 73.96 | 0.500 | 0.800 | 96  |
| I-Ed     | 82.45 | 77.13 | 87.77 | 0.653 | 0.903 | 188 |
| I-Ek     | 84.31 | 78.43 | 90.20 | 0.691 | 0.913 | 204 |

Table S8: Performance of LA method on MHCPEP-SRDS2 datasets using 5-fold cross-validation test. Last column refers to the number of binding peptides. For each dataset an equal number of non-binding peptide is generated randomly from Swissprot sequences (see Methods section for details).

| allele   | ACC   | Sn    | Sp    | CC    | AUC   | N   |
|----------|-------|-------|-------|-------|-------|-----|
| HLA-DQ2  | 65.63 | 71.88 | 59.38 | 0.315 | 0.678 | 32  |
| HLA-DQ4  | 88.61 | 83.54 | 93.67 | 0.776 | 0.954 | 79  |
| HLA-DQ7  | 67.69 | 70.77 | 64.62 | 0.355 | 0.713 | 65  |
| HLA-DR1  | 64.46 | 61.16 | 67.77 | 0.290 | 0.715 | 242 |
| HLA-DR2  | 61.54 | 65.38 | 57.69 | 0.231 | 0.633 | 104 |
| HLA-DR3  | 55.80 | 63.77 | 47.83 | 0.117 | 0.602 | 69  |
| HLA-DR4  | 64.43 | 65.10 | 63.76 | 0.289 | 0.711 | 298 |
| HLA-DR5  | 53.28 | 63.93 | 42.62 | 0.067 | 0.622 | 61  |
| HLA-DR7  | 60.92 | 66.67 | 55.17 | 0.220 | 0.622 | 87  |
| HLA-DR8  | 64.13 | 71.74 | 56.52 | 0.286 | 0.717 | 46  |
| HLA-DR9  | 70.59 | 64.71 | 76.47 | 0.415 | 0.754 | 34  |
| HLA-DR11 | 73.50 | 69.00 | 78.00 | 0.472 | 0.810 | 100 |
| HLA-DR13 | 73.53 | 76.47 | 70.59 | 0.471 | 0.827 | 34  |
| HLA-DR15 | 58.33 | 58.33 | 58.33 | 0.167 | 0.698 | 36  |
| HLA-DR17 | 57.50 | 62.50 | 52.50 | 0.151 | 0.612 | 40  |
| HLA-DR51 | 64.10 | 71.79 | 56.41 | 0.285 | 0.664 | 39  |
| I-Ab     | 60.78 | 56.86 | 64.71 | 0.216 | 0.624 | 51  |
| I-Ad     | 60.40 | 56.44 | 64.36 | 0.209 | 0.700 | 101 |
| I-Ag7    | 70.75 | 64.15 | 77.36 | 0.419 | 0.756 | 53  |
| I-Ak     | 63.43 | 55.22 | 71.64 | 0.272 | 0.664 | 67  |
| I-Ed     | 69.64 | 71.43 | 67.86 | 0.393 | 0.760 | 56  |
| I-Ek     | 64.06 | 64.06 | 64.06 | 0.281 | 0.756 | 64  |



Table S9: Performance of LA method on MHCPEP-SRDS3 datasets using 5-fold cross-validation test. Last column refers to the number of binding peptides. For each dataset an equal number of non-binding peptide is generated randomly from Swissprot sequences (see Methods section for details).

| allele   | ACC   | Sn    | Sp    | CC    | AUC   | N   |
|----------|-------|-------|-------|-------|-------|-----|
| HLA-DQ2  | 65.38 | 58.97 | 71.79 | 0.310 | 0.655 | 39  |
| HLA-DQ4  | 79.88 | 74.39 | 85.37 | 0.601 | 0.900 | 82  |
| HLA-DQ7  | 70.67 | 72.00 | 69.33 | 0.413 | 0.757 | 75  |
| HLA-DR1  | 66.37 | 66.91 | 65.83 | 0.327 | 0.747 | 278 |
| HLA-DR2  | 64.18 | 67.16 | 61.19 | 0.284 | 0.736 | 134 |
| HLA-DR3  | 64.38 | 67.12 | 61.64 | 0.288 | 0.657 | 73  |
| HLA-DR4  | 64.02 | 62.89 | 65.16 | 0.281 | 0.717 | 353 |
| HLA-DR5  | 64.00 | 73.33 | 54.67 | 0.285 | 0.723 | 75  |
| HLA-DR7  | 67.82 | 74.26 | 61.39 | 0.359 | 0.765 | 101 |
| HLA-DR8  | 69.44 | 70.37 | 68.52 | 0.389 | 0.732 | 54  |
| HLA-DR9  | 72.97 | 72.97 | 72.97 | 0.459 | 0.779 | 37  |
| HLA-DR11 | 78.16 | 74.76 | 81.55 | 0.564 | 0.854 | 103 |
| HLA-DR13 | 63.89 | 69.44 | 58.33 | 0.280 | 0.623 | 36  |
| HLA-DR15 | 59.18 | 67.35 | 51.02 | 0.186 | 0.713 | 49  |
| HLA-DR17 | 68.89 | 60.00 | 77.78 | 0.384 | 0.769 | 45  |
| HLA-DR51 | 65.45 | 72.73 | 58.18 | 0.312 | 0.780 | 55  |
| I-Ab     | 61.48 | 50.82 | 72.13 | 0.235 | 0.611 | 61  |
| I-Ad     | 67.41 | 70.37 | 64.44 | 0.349 | 0.785 | 135 |
| I-Ag7    | 72.22 | 76.54 | 67.90 | 0.446 | 0.804 | 81  |
| I-Ak     | 71.18 | 65.88 | 76.47 | 0.426 | 0.766 | 85  |
| I-Ed     | 78.95 | 84.21 | 73.68 | 0.582 | 0.852 | 76  |
| I-Ek     | 66.67 | 71.79 | 61.54 | 0.335 | 0.789 | 78  |

Table S10: Performance of LA method on MHCPEP-WUPDS datasets using 5-fold cross-validation test. Each dataset is obtained by applying the peptide weighting procedure separately to the binders and non-binders in the corresponding MHCPEP-UPDS dataset (see Methods section for details).

| allele   | ACC   | Sn    | Sp    | CC    | AUC   |
|----------|-------|-------|-------|-------|-------|
| HLA-DQ2  | 77.24 | 42.68 | 86.73 | 0.304 | 0.738 |
| HLA-DQ4  | 77.27 | 68.35 | 84.54 | 0.539 | 0.882 |
| HLA-DQ7  | 73.67 | 54.35 | 82.96 | 0.385 | 0.786 |
| HLA-DR1  | 79.57 | 28.27 | 94.17 | 0.300 | 0.710 |
| HLA-DR2  | 75.01 | 30.41 | 90.16 | 0.250 | 0.688 |
| HLA-DR3  | 71.32 | 39.73 | 83.33 | 0.245 | 0.678 |
| HLA-DR4  | 79.38 | 22.50 | 94.81 | 0.249 | 0.723 |
| HLA-DR5  | 79.30 | 42.65 | 92.55 | 0.416 | 0.709 |
| HLA-DR7  | 78.78 | 12.85 | 95.60 | 0.142 | 0.599 |
| HLA-DR8  | 82.21 | 66.11 | 88.00 | 0.542 | 0.810 |
| HLA-DR9  | 93.73 | 57.50 | 96.81 | 0.556 | 0.819 |
| HLA-DR11 | 83.84 | 34.20 | 94.37 | 0.352 | 0.798 |
| HLA-DR13 | 75.32 | 23.53 | 90.00 | 0.167 | 0.714 |
| HLA-DR15 | 75.78 | 40.00 | 87.60 | 0.303 | 0.627 |
| HLA-DR17 | 82.91 | 39.02 | 94.30 | 0.407 | 0.760 |
| HLA-DR51 | 74.89 | 53.24 | 82.61 | 0.356 | 0.786 |
| I-Ab     | 74.06 | 46.08 | 84.56 | 0.320 | 0.669 |
| I-Ad     | 82.49 | 32.81 | 95.66 | 0.381 | 0.740 |
| I-Ag7    | 78.40 | 57.14 | 85.99 | 0.436 | 0.797 |
| I-Ak     | 79.33 | 33.09 | 91.34 | 0.287 | 0.684 |
| I-Ed     | 95.46 | 24.00 | 98.63 | 0.303 | 0.760 |
| I-Ek     | 90.83 | 30.28 | 97.90 | 0.394 | 0.824 |

Table S11: Performance of SVM using 5-spectrum kernel method on MHCPEP-UPDS datasets using 5-fold cross-validation test. Last column refers to the number of binding peptides. For each dataset an equal number of non-binding peptide is generated randomly from Swissprot sequences (see Methods section for details).

| allele   | ACC   | Sn    | Sp     | CC    | AUC   | N    |
|----------|-------|-------|--------|-------|-------|------|
| HLA-DQ2  | 89.38 | 78.76 | 100.00 | 0.806 | 0.908 | 113  |
| HLA-DQ4  | 63.40 | 26.80 | 100.00 | 0.393 | 0.628 | 97   |
| HLA-DQ7  | 84.44 | 68.89 | 100.00 | 0.725 | 0.856 | 135  |
| HLA-DR1  | 86.13 | 72.26 | 100.00 | 0.752 | 0.883 | 703  |
| HLA-DR2  | 86.19 | 72.38 | 100.00 | 0.753 | 0.884 | 315  |
| HLA-DR3  | 86.46 | 72.92 | 100.00 | 0.757 | 0.854 | 192  |
| HLA-DR4  | 90.55 | 81.29 | 99.82  | 0.825 | 0.917 | 1085 |
| HLA-DR5  | 88.89 | 77.78 | 100.00 | 0.798 | 0.905 | 189  |
| HLA-DR7  | 91.35 | 82.70 | 100.00 | 0.840 | 0.916 | 341  |
| HLA-DR8  | 89.60 | 79.20 | 100.00 | 0.810 | 0.894 | 125  |
| HLA-DR9  | 85.11 | 70.21 | 100.00 | 0.736 | 0.836 | 94   |
| HLA-DR11 | 90.27 | 80.55 | 100.00 | 0.821 | 0.910 | 473  |
| HLA-DR13 | 88.02 | 76.03 | 100.00 | 0.783 | 0.875 | 121  |
| HLA-DR15 | 85.54 | 71.07 | 100.00 | 0.742 | 0.887 | 121  |
| HLA-DR17 | 91.46 | 82.91 | 100.00 | 0.841 | 0.907 | 158  |
| HLA-DR51 | 87.83 | 75.65 | 100.00 | 0.780 | 0.924 | 115  |
| I-Ab     | 87.87 | 75.74 | 100.00 | 0.781 | 0.865 | 136  |
| I-Ad     | 91.93 | 83.86 | 100.00 | 0.850 | 0.942 | 415  |
| I-Ag7    | 89.49 | 78.98 | 100.00 | 0.808 | 0.916 | 157  |
| I-Ak     | 88.39 | 76.77 | 100.00 | 0.789 | 0.909 | 254  |
| I-Ed     | 89.29 | 78.57 | 100.00 | 0.804 | 0.918 | 294  |
| I-Ek     | 90.42 | 80.84 | 100.00 | 0.824 | 0.934 | 334  |

Table S12: Performance of SVM using 5-spectrum kernel method on MHCPEP-SRDS1 datasets using 5-fold cross-validation test. Last column refers to the number of binding peptides. For each dataset an equal number of non-binding peptide is generated randomly from Swissprot sequences (see Methods section for details).

| allele   | ACC   | Sn    | Sp     | CC    | AUC   | N   |
|----------|-------|-------|--------|-------|-------|-----|
| HLA-DQ2  | 78.36 | 56.72 | 100.00 | 0.629 | 0.789 | 67  |
| HLA-DQ4  | 57.14 | 15.48 | 98.81  | 0.258 | 0.544 | 84  |
| HLA-DQ7  | 65.07 | 31.51 | 98.63  | 0.407 | 0.677 | 73  |
| HLA-DR1  | 67.56 | 36.01 | 99.11  | 0.453 | 0.662 | 336 |
| HLA-DR2  | 68.58 | 37.16 | 100.00 | 0.478 | 0.694 | 148 |
| HLA-DR3  | 62.35 | 24.69 | 100.00 | 0.375 | 0.603 | 81  |
| HLA-DR4  | 70.96 | 43.28 | 98.63  | 0.503 | 0.710 | 439 |
| HLA-DR5  | 72.83 | 45.65 | 100.00 | 0.544 | 0.691 | 92  |
| HLA-DR7  | 70.80 | 42.34 | 99.27  | 0.506 | 0.721 | 137 |
| HLA-DR8  | 54.26 | 8.51  | 100.00 | 0.211 | 0.552 | 47  |
| HLA-DR9  | 63.41 | 26.83 | 100.00 | 0.394 | 0.620 | 41  |
| HLA-DR11 | 70.31 | 40.63 | 100.00 | 0.505 | 0.703 | 160 |
| HLA-DR13 | 77.21 | 54.41 | 100.00 | 0.611 | 0.746 | 68  |
| HLA-DR15 | 69.79 | 39.58 | 100.00 | 0.497 | 0.711 | 48  |
| HLA-DR17 | 80.49 | 60.98 | 100.00 | 0.662 | 0.789 | 82  |
| HLA-DR51 | 66.67 | 33.33 | 100.00 | 0.447 | 0.651 | 45  |
| I-Ab     | 64.52 | 29.03 | 100.00 | 0.412 | 0.620 | 62  |
| I-Ad     | 78.27 | 56.55 | 100.00 | 0.628 | 0.787 | 168 |
| I-Ag7    | 72.58 | 45.16 | 100.00 | 0.540 | 0.718 | 62  |
| I-Ak     | 72.92 | 45.83 | 100.00 | 0.545 | 0.761 | 96  |
| I-Ed     | 81.12 | 62.23 | 100.00 | 0.672 | 0.826 | 188 |
| I-Ek     | 85.29 | 70.59 | 100.00 | 0.739 | 0.874 | 204 |

Table S13: Performance of SVM using 5-spectrum kernel method on MHCPEP-SRDS2 datasets using 5-fold cross-validation test. Last column refers to the number of binding peptides. For each dataset an equal number of non-binding peptide is generated randomly from Swissprot sequences (see Methods section for details).

| allele   | ACC   | Sn    | Sp     | CC     | AUC   | N   |
|----------|-------|-------|--------|--------|-------|-----|
| HLA-DQ2  | 53.13 | 28.13 | 78.13  | 0.072  | 0.566 | 32  |
| HLA-DQ4  | 57.59 | 16.46 | 98.73  | 0.267  | 0.590 | 79  |
| HLA-DQ7  | 61.54 | 24.62 | 98.46  | 0.342  | 0.616 | 65  |
| HLA-DR1  | 55.58 | 12.81 | 98.35  | 0.215  | 0.562 | 242 |
| HLA-DR2  | 54.81 | 30.77 | 78.85  | 0.110  | 0.548 | 104 |
| HLA-DR3  | 51.45 | 24.64 | 78.26  | 0.034  | 0.514 | 69  |
| HLA-DR4  | 56.04 | 33.22 | 78.86  | 0.136  | 0.578 | 298 |
| HLA-DR5  | 58.20 | 16.39 | 100.00 | 0.299  | 0.583 | 61  |
| HLA-DR7  | 55.17 | 31.03 | 79.31  | 0.118  | 0.562 | 87  |
| HLA-DR8  | 51.09 | 21.74 | 80.43  | 0.027  | 0.526 | 46  |
| HLA-DR9  | 48.53 | 58.82 | 38.24  | -0.030 | 0.488 | 34  |
| HLA-DR11 | 51.50 | 43.00 | 60.00  | 0.030  | 0.528 | 100 |
| HLA-DR13 | 50.00 | 41.18 | 58.82  | 0.000  | 0.518 | 34  |
| HLA-DR15 | 59.72 | 38.89 | 80.56  | 0.214  | 0.592 | 36  |
| HLA-DR17 | 56.25 | 32.50 | 80.00  | 0.142  | 0.568 | 40  |
| HLA-DR51 | 60.26 | 20.51 | 100.00 | 0.338  | 0.578 | 39  |
| I-Ab     | 54.90 | 49.02 | 60.78  | 0.099  | 0.570 | 51  |
| I-Ad     | 62.87 | 27.72 | 98.02  | 0.362  | 0.623 | 101 |
| I-Ag7    | 70.75 | 41.51 | 100.00 | 0.512  | 0.713 | 53  |
| I-Ak     | 61.19 | 23.88 | 98.51  | 0.336  | 0.586 | 67  |
| I-Ed     | 66.07 | 32.14 | 100.00 | 0.438  | 0.645 | 56  |
| I-Ek     | 60.16 | 39.06 | 81.25  | 0.224  | 0.606 | 64  |

Table S14: Performance of SVM using 5-spectrum kernel method on MHCPEP-SRDS3 datasets using 5-fold cross-validation test. Last column refers to the number of binding peptides. For each dataset an equal number of non-binding peptide is generated randomly from Swissprot sequences (see Methods section for details).

| allele   | ACC   | Sn    | Sp     | CC    | AUC   | N   |
|----------|-------|-------|--------|-------|-------|-----|
| HLA-DQ2  | 70.51 | 41.03 | 100.00 | 0.508 | 0.663 | 39  |
| HLA-DQ4  | 59.15 | 18.29 | 100.00 | 0.317 | 0.608 | 82  |
| HLA-DQ7  | 69.33 | 38.67 | 100.00 | 0.490 | 0.699 | 75  |
| HLA-DR1  | 66.73 | 34.17 | 99.28  | 0.441 | 0.676 | 278 |
| HLA-DR2  | 73.13 | 46.27 | 100.00 | 0.549 | 0.724 | 134 |
| HLA-DR3  | 58.22 | 16.44 | 100.00 | 0.299 | 0.623 | 73  |
| HLA-DR4  | 68.56 | 38.81 | 98.30  | 0.462 | 0.679 | 353 |
| HLA-DR5  | 72.00 | 45.33 | 98.67  | 0.520 | 0.719 | 75  |
| HLA-DR7  | 64.85 | 30.69 | 99.01  | 0.407 | 0.631 | 101 |
| HLA-DR8  | 64.81 | 29.63 | 100.00 | 0.417 | 0.608 | 54  |
| HLA-DR9  | 51.35 | 24.32 | 78.38  | 0.032 | 0.520 | 37  |
| HLA-DR11 | 52.43 | 44.66 | 60.19  | 0.049 | 0.544 | 103 |
| HLA-DR13 | 55.56 | 30.56 | 80.56  | 0.128 | 0.563 | 36  |
| HLA-DR15 | 77.55 | 55.10 | 100.00 | 0.617 | 0.805 | 49  |
| HLA-DR17 | 64.44 | 28.89 | 100.00 | 0.411 | 0.629 | 45  |
| HLA-DR51 | 82.73 | 65.45 | 100.00 | 0.697 | 0.800 | 55  |
| I-Ab     | 67.21 | 34.43 | 100.00 | 0.456 | 0.606 | 61  |
| I-Ad     | 81.48 | 62.96 | 100.00 | 0.678 | 0.821 | 135 |
| I-Ag7    | 79.63 | 59.26 | 100.00 | 0.649 | 0.823 | 81  |
| I-Ak     | 74.71 | 49.41 | 100.00 | 0.573 | 0.768 | 85  |
| I-Ed     | 79.61 | 59.21 | 100.00 | 0.649 | 0.828 | 76  |
| I-Ek     | 73.08 | 46.15 | 100.00 | 0.548 | 0.714 | 78  |

Table S15: Performance of SVM using 5-spectrum kernel method on MHCPEP-WUPDS datasets using 5-fold cross-validation test. Each dataset is obtained by applying the peptide weighting procedure separately to the binders and non-binders in the corresponding MHCPEP-UPDS dataset (see Methods section for details).

| allele   | ACC   | Sn     | Sp     | CC    | AUC   |
|----------|-------|--------|--------|-------|-------|
| HLA-DQ2  | 35.38 | 90.13  | 20.35  | 0.112 | 0.717 |
| HLA-DQ4  | 59.66 | 10.13  | 100.00 | 0.242 | 0.543 |
| HLA-DQ7  | 80.50 | 40.00  | 100.00 | 0.557 | 0.716 |
| HLA-DR1  | 23.37 | 100.00 | 1.56   | 0.059 | 0.696 |
| HLA-DR2  | 82.03 | 29.63  | 100.00 | 0.489 | 0.682 |
| HLA-DR3  | 80.11 | 27.08  | 100.00 | 0.461 | 0.612 |
| HLA-DR4  | 87.14 | 42.14  | 99.35  | 0.580 | 0.723 |
| HLA-DR5  | 85.16 | 44.12  | 100.00 | 0.606 | 0.765 |
| HLA-DR7  | 88.08 | 41.38  | 100.00 | 0.600 | 0.714 |
| HLA-DR8  | 90.00 | 62.22  | 100.00 | 0.740 | 0.796 |
| HLA-DR9  | 92.16 | NaN    | 92.16  | NaN   | 0.806 |
| HLA-DR11 | 85.57 | 17.60  | 100.00 | 0.387 | 0.612 |
| HLA-DR13 | 83.64 | 25.91  | 100.00 | 0.463 | 0.620 |
| HLA-DR15 | 84.01 | 35.63  | 100.00 | 0.542 | 0.760 |
| HLA-DR17 | 75.88 | 60.98  | 79.75  | 0.364 | 0.747 |
| HLA-DR51 | 87.29 | 51.63  | 100.00 | 0.664 | 0.838 |
| I-Ab     | 82.89 | 37.25  | 100.00 | 0.549 | 0.650 |
| I-Ad     | 90.15 | 52.99  | 100.00 | 0.686 | 0.815 |
| I-Ag7    | 88.68 | 56.36  | 100.00 | 0.699 | 0.820 |
| I-Ak     | 89.26 | 47.92  | 100.00 | 0.650 | 0.778 |
| I-Ed     | 97.56 | 42.62  | 100.00 | 0.645 | 0.742 |
| I-Ek     | 78.25 | 61.23  | 80.24  | 0.297 | 0.734 |

Table S16: Performance of CTD method on MHCBN-UPDS datasets using 5-fold cross-validation test.

| allele       | ACC   | Sn    | Sp    | CC    | AUC   | binders | Non-binders |
|--------------|-------|-------|-------|-------|-------|---------|-------------|
| HLA-DR1      | 79.90 | 91.51 | 38.89 | 0.351 | 0.789 | 636     | 180         |
| HLA-DR2      | 80.14 | 93.51 | 47.02 | 0.476 | 0.786 | 416     | 168         |
| HLA-DR5      | 72.12 | 79.36 | 63.01 | 0.431 | 0.752 | 218     | 173         |
| HLA-DRB10101 | 83.59 | 91.71 | 49.61 | 0.442 | 0.804 | 531     | 127         |
| HLA-DRB10301 | 72.51 | 73.95 | 70.87 | 0.448 | 0.787 | 261     | 230         |
| HLA-DRB10401 | 82.31 | 96.15 | 26.87 | 0.331 | 0.721 | 805     | 201         |
| HLA-DRB10701 | 78.20 | 91.44 | 42.06 | 0.390 | 0.732 | 292     | 107         |
| HLA-DRB11101 | 79.14 | 85.23 | 63.50 | 0.485 | 0.832 | 352     | 137         |

Table S17: Performance of CTD method on MHCBN-SRDS1 datasets using 5-fold cross-validation test.

| allele       | ACC   | Sn    | Sp    | CC    | AUC   | binders | Non-binders |
|--------------|-------|-------|-------|-------|-------|---------|-------------|
| HLA-DR1      | 79.73 | 93.90 | 37.84 | 0.396 | 0.738 | 328     | 111         |
| HLA-DR2      | 73.52 | 87.82 | 50.81 | 0.423 | 0.750 | 197     | 124         |
| HLA-DR5      | 64.88 | 55.86 | 72.52 | 0.288 | 0.692 | 111     | 131         |
| HLA-DRB10101 | 81.60 | 93.54 | 37.50 | 0.377 | 0.748 | 325     | 88          |
| HLA-DRB10301 | 63.41 | 64.23 | 62.67 | 0.269 | 0.661 | 137     | 150         |
| HLA-DRB10401 | 77.76 | 92.36 | 27.21 | 0.251 | 0.655 | 471     | 136         |
| HLA-DRB10701 | 74.49 | 86.59 | 42.65 | 0.318 | 0.748 | 179     | 68          |
| HLA-DRB11101 | 75.00 | 89.20 | 40.23 | 0.338 | 0.759 | 213     | 87          |

Table S18: Performance of CTD method on MHCBN-SRDS2 datasets using 5-fold cross-validation test.

| allele       | ACC   | Sn    | Sp    | CC    | AUC   | binders | Non-binders |
|--------------|-------|-------|-------|-------|-------|---------|-------------|
| HLA-DR1      | 72.04 | 88.79 | 36.79 | 0.302 | 0.698 | 223     | 106         |
| HLA-DR2      | 68.84 | 78.43 | 56.91 | 0.363 | 0.716 | 153     | 123         |
| HLA-DR5      | 56.94 | 31.25 | 72.87 | 0.044 | 0.588 | 80      | 129         |
| HLA-DRB10101 | 80.56 | 96.06 | 23.68 | 0.296 | 0.683 | 279     | 76          |
| HLA-DRB10301 | 59.93 | 59.06 | 60.69 | 0.197 | 0.628 | 127     | 145         |
| HLA-DRB10401 | 75.72 | 92.08 | 20.17 | 0.166 | 0.620 | 404     | 119         |
| HLA-DRB10701 | 70.64 | 87.50 | 31.82 | 0.229 | 0.696 | 152     | 66          |
| HLA-DRB11101 | 74.35 | 83.52 | 55.17 | 0.399 | 0.757 | 182     | 87          |



Table S19: Performance of CTD method on MHCBN-SRDS3 datasets using 5-fold cross-validation test.

| allele       | ACC   | Sn    | Sp    | CC    | AUC   | binders | Non-binders |
|--------------|-------|-------|-------|-------|-------|---------|-------------|
| HLA-DR1      | 73.78 | 86.49 | 48.46 | 0.380 | 0.743 | 259     | 130         |
| HLA-DR2      | 73.01 | 87.26 | 44.62 | 0.355 | 0.719 | 259     | 130         |
| HLA-DR5      | 58.66 | 40.00 | 70.78 | 0.112 | 0.608 | 100     | 154         |
| HLA-DRB10101 | 81.67 | 95.13 | 34.82 | 0.390 | 0.725 | 390     | 112         |
| HLA-DRB10301 | 64.62 | 60.57 | 67.91 | 0.285 | 0.675 | 175     | 215         |
| HLA-DRB10401 | 77.68 | 95.21 | 22.99 | 0.270 | 0.710 | 543     | 174         |
| HLA-DRB10701 | 71.15 | 87.79 | 32.61 | 0.242 | 0.671 | 213     | 92          |
| HLA-DRB11101 | 74.59 | 82.01 | 61.07 | 0.437 | 0.775 | 239     | 131         |

Table S20: Performance of CTD method on MHCBN-WUPDS datasets using 5-fold cross-validation test.

| allele       | ACC   | Sn    | Sp    | CC    | AUC   |
|--------------|-------|-------|-------|-------|-------|
| HLA-DR1      | 72.93 | 85.40 | 47.30 | 0.353 | 0.732 |
| HLA-DR2      | 68.90 | 79.62 | 55.88 | 0.367 | 0.740 |
| HLA-DR5      | 61.84 | 48.95 | 69.89 | 0.189 | 0.543 |
| HLA-DRB10101 | 76.62 | 87.32 | 41.68 | 0.310 | 0.666 |
| HLA-DRB10301 | 65.27 | 61.04 | 68.88 | 0.300 | 0.678 |
| HLA-DRB10401 | 81.36 | 94.44 | 15.97 | 0.149 | 0.701 |
| HLA-DRB10701 | 71.36 | 86.44 | 35.55 | 0.251 | 0.702 |
| HLA-DRB11101 | 73.57 | 82.11 | 56.28 | 0.392 | 0.789 |

Table S21: Performance of LA method on MHCBN-UPDS datasets using 5-fold cross-validation test.

| allele       | ACC   | Sn    | Sp    | CC    | AUC   | binders | Non-binders |
|--------------|-------|-------|-------|-------|-------|---------|-------------|
| HLA-DR1      | 80.27 | 95.75 | 25.56 | 0.310 | 0.768 | 636     | 180         |
| HLA-DR2      | 77.91 | 95.67 | 33.93 | 0.401 | 0.771 | 416     | 168         |
| HLA-DR5      | 69.57 | 62.84 | 78.03 | 0.408 | 0.748 | 218     | 173         |
| HLA-DRB10101 | 81.76 | 96.80 | 18.90 | 0.256 | 0.799 | 531     | 127         |
| HLA-DRB10301 | 71.89 | 73.56 | 70.00 | 0.436 | 0.795 | 261     | 230         |
| HLA-DRB10401 | 82.80 | 95.53 | 31.84 | 0.366 | 0.780 | 805     | 201         |
| HLA-DRB10701 | 82.46 | 93.84 | 51.40 | 0.518 | 0.842 | 292     | 107         |
| HLA-DRB11101 | 80.16 | 90.34 | 54.01 | 0.480 | 0.874 | 352     | 137         |

Table S22: Performance of LA method on MHCBN-SRDS1 datasets using 5-fold cross-validation test.

| allele       | ACC   | Sn    | Sp    | CC    | AUC   | binders | Non-binders |
|--------------|-------|-------|-------|-------|-------|---------|-------------|
| HLA-DR1      | 79.04 | 93.60 | 36.04 | 0.372 | 0.784 | 328     | 111         |
| HLA-DR2      | 67.29 | 78.68 | 49.19 | 0.291 | 0.707 | 197     | 124         |
| HLA-DR5      | 64.88 | 35.14 | 90.08 | 0.306 | 0.657 | 111     | 131         |
| HLA-DRB10101 | 78.21 | 95.08 | 15.91 | 0.173 | 0.690 | 325     | 88          |
| HLA-DRB10301 | 58.54 | 59.85 | 57.33 | 0.172 | 0.617 | 137     | 150         |
| HLA-DRB10401 | 76.94 | 95.75 | 11.76 | 0.133 | 0.676 | 471     | 136         |
| HLA-DRB10701 | 71.26 | 88.27 | 26.47 | 0.181 | 0.665 | 179     | 68          |
| HLA-DRB11101 | 73.00 | 87.79 | 36.78 | 0.282 | 0.776 | 213     | 87          |

Table S23: Performance of LA method on MHCBN-SRDS2 datasets using 5-fold cross-validation test.

| allele       | ACC   | Sn    | Sp    | CC     | AUC   | binders | Non-binders |
|--------------|-------|-------|-------|--------|-------|---------|-------------|
| HLA-DR1      | 68.39 | 82.51 | 38.68 | 0.231  | 0.717 | 223     | 106         |
| HLA-DR2      | 62.32 | 71.24 | 51.22 | 0.229  | 0.665 | 153     | 123         |
| HLA-DR5      | 47.85 | 15.00 | 68.22 | -0.188 | 0.459 | 80      | 129         |
| HLA-DRB10101 | 77.18 | 92.11 | 22.37 | 0.190  | 0.705 | 279     | 76          |
| HLA-DRB10301 | 55.88 | 54.33 | 57.24 | 0.116  | 0.563 | 127     | 145         |
| HLA-DRB10401 | 75.72 | 91.09 | 23.53 | 0.187  | 0.658 | 404     | 119         |
| HLA-DRB10701 | 66.97 | 86.84 | 21.21 | 0.102  | 0.617 | 152     | 66          |
| HLA-DRB11101 | 66.54 | 82.42 | 33.33 | 0.176  | 0.705 | 182     | 87          |

Table S24: Performance of LA method on MHCBN-SRDS3 datasets using 5-fold cross-validation test.

| allele       | ACC   | Sn    | Sp    | CC    | AUC   | binders | Non-binders |
|--------------|-------|-------|-------|-------|-------|---------|-------------|
| HLA-DR1      | 74.29 | 84.94 | 53.08 | 0.400 | 0.768 | 259     | 130         |
| HLA-DR2      | 70.87 | 78.45 | 59.06 | 0.381 | 0.741 | 232     | 149         |
| HLA-DR5      | 58.27 | 35.00 | 73.38 | 0.089 | 0.616 | 100     | 154         |
| HLA-DRB10101 | 83.47 | 93.85 | 47.32 | 0.476 | 0.819 | 390     | 112         |
| HLA-DRB10301 | 67.18 | 61.14 | 72.09 | 0.334 | 0.736 | 175     | 215         |
| HLA-DRB10401 | 79.78 | 92.45 | 40.23 | 0.387 | 0.760 | 543     | 174         |
| HLA-DRB10701 | 80.33 | 91.08 | 55.43 | 0.508 | 0.794 | 213     | 92          |
| HLA-DRB11101 | 75.14 | 84.94 | 57.25 | 0.440 | 0.816 | 239     | 131         |

Table S25: Performance of LA method on MHCBN-WUPDS datasets using 5-fold cross-validation test.

| allele       | ACC   | Sn    | Sp    | CC    | AUC   |
|--------------|-------|-------|-------|-------|-------|
| HLA-DR1      | 75.32 | 92.37 | 40.28 | 0.396 | 0.747 |
| HLA-DR2      | 70.50 | 83.06 | 55.23 | 0.402 | 0.717 |
| HLA-DR5      | 62.10 | 18.96 | 89.06 | 0.112 | 0.594 |
| HLA-DRB10101 | 71.91 | 90.23 | 12.16 | 0.033 | 0.672 |
| HLA-DRB10301 | 66.66 | 64.47 | 68.53 | 0.330 | 0.710 |
| HLA-DRB10401 | 84.24 | 95.55 | 27.67 | 0.313 | 0.757 |
| HLA-DRB10701 | 75.85 | 91.99 | 37.50 | 0.361 | 0.724 |
| HLA-DRB11101 | 76.42 | 88.54 | 51.90 | 0.440 | 0.820 |

Table S26: Performance of SVM using 5-spectrum kernel method on MHCBN-UPDS datasets using 5-fold cross-validation test.

| allele       | ACC   | Sn    | Sp    | CC    | AUC   | binders | Non-binders |
|--------------|-------|-------|-------|-------|-------|---------|-------------|
| HLA-DR1      | 77.94 | 86.32 | 48.33 | 0.351 | 0.747 | 636     | 180         |
| HLA-DR2      | 74.66 | 75.48 | 72.62 | 0.448 | 0.806 | 416     | 168         |
| HLA-DR5      | 71.61 | 67.89 | 76.30 | 0.439 | 0.743 | 218     | 173         |
| HLA-DRB10101 | 83.89 | 90.58 | 55.91 | 0.474 | 0.758 | 531     | 127         |
| HLA-DRB10301 | 70.26 | 82.76 | 56.09 | 0.405 | 0.770 | 261     | 230         |
| HLA-DRB10401 | 76.84 | 82.24 | 55.22 | 0.345 | 0.705 | 805     | 201         |
| HLA-DRB10701 | 77.69 | 79.11 | 73.83 | 0.491 | 0.778 | 292     | 107         |
| HLA-DRB11101 | 66.67 | 62.78 | 76.64 | 0.354 | 0.754 | 352     | 137         |

Table S27: Performance of SVM using 5-spectrum kernel method on MHCBN-SRDS1 datasets using 5-fold cross-validation test.

| allele       | ACC   | Sn    | Sp    | CC     | AUC   | binders | Non-binders |
|--------------|-------|-------|-------|--------|-------|---------|-------------|
| HLA-DR1      | 72.89 | 89.63 | 23.42 | 0.165  | 0.545 | 328     | 111         |
| HLA-DR2      | 39.88 | 19.80 | 71.77 | -0.097 | 0.456 | 197     | 124         |
| HLA-DR5      | 51.65 | 69.37 | 36.64 | 0.063  | 0.533 | 111     | 131         |
| HLA-DRB10101 | 69.49 | 83.38 | 18.18 | 0.017  | 0.456 | 325     | 88          |
| HLA-DRB10301 | 42.16 | 63.50 | 22.67 | -0.152 | 0.323 | 137     | 150         |
| HLA-DRB10401 | 68.04 | 81.95 | 19.85 | 0.019  | 0.381 | 471     | 136         |
| HLA-DRB10701 | 46.96 | 49.72 | 39.71 | -0.095 | 0.424 | 179     | 68          |
| HLA-DRB11101 | 54.33 | 57.75 | 45.98 | 0.034  | 0.493 | 213     | 87          |

Table S28: Performance of SVM using 5-spectrum kernel method on MHCBN-SRDS2 datasets using 5-fold cross-validation test.

| allele       | ACC   | Sn    | Sp    | CC     | AUC   | binders | Non-binders |
|--------------|-------|-------|-------|--------|-------|---------|-------------|
| HLA-DR1      | 66.26 | 87.00 | 22.64 | 0.123  | 0.448 | 223     | 106         |
| HLA-DR2      | 34.42 | 15.69 | 57.72 | -0.296 | 0.374 | 153     | 123         |
| HLA-DR5      | 43.06 | 52.50 | 37.21 | -0.102 | 0.369 | 80      | 129         |
| HLA-DRB10101 | 56.34 | 66.31 | 19.74 | -0.124 | 0.351 | 279     | 76          |
| HLA-DRB10301 | 35.29 | 37.01 | 33.79 | -0.292 | 0.273 | 127     | 145         |
| HLA-DRB10401 | 43.02 | 49.01 | 22.69 | -0.239 | 0.261 | 404     | 119         |
| HLA-DRB10701 | 62.84 | 78.95 | 25.76 | 0.052  | 0.414 | 152     | 66          |
| HLA-DRB11101 | 33.46 | 22.53 | 56.32 | -0.217 | 0.386 | 182     | 87          |

Table S29: Performance of SVM using 5-spectrum kernel method on MHCBN-SRDS3 datasets using 5-fold cross-validation test.

| allele       | ACC   | Sn    | Sp    | CC    | AUC   | binders | Non-binders |
|--------------|-------|-------|-------|-------|-------|---------|-------------|
| HLA-DR1      | 73.78 | 86.87 | 47.69 | 0.378 | 0.685 | 259     | 130         |
| HLA-DR2      | 62.99 | 56.47 | 73.15 | 0.291 | 0.709 | 232     | 149         |
| HLA-DR5      | 58.27 | 30.00 | 76.62 | 0.074 | 0.557 | 100     | 154         |
| HLA-DRB10101 | 77.29 | 83.08 | 57.14 | 0.382 | 0.691 | 390     | 112         |
| HLA-DRB10301 | 63.08 | 49.71 | 73.95 | 0.244 | 0.678 | 175     | 215         |
| HLA-DRB10401 | 75.59 | 83.06 | 52.30 | 0.348 | 0.624 | 543     | 174         |
| HLA-DRB10701 | 62.62 | 58.22 | 72.83 | 0.285 | 0.737 | 213     | 92          |
| HLA-DRB11101 | 59.19 | 47.28 | 80.92 | 0.279 | 0.755 | 239     | 131         |

Table S30: Performance of SVM using 5-spectrum kernel method on MHCBN-WUPDS datasets using 5-fold cross-validation test.

| allele       | ACC   | Sn    | Sp    | CC    | AUC   |
|--------------|-------|-------|-------|-------|-------|
| HLA-DR1      | 72.93 | 93.86 | 29.93 | 0.322 | 0.655 |
| HLA-DR2      | 62.87 | 81.00 | 40.84 | 0.240 | 0.636 |
| HLA-DR5      | 57.24 | 26.36 | 76.53 | 0.033 | 0.518 |
| HLA-DRB10101 | 72.23 | 90.87 | 11.42 | 0.033 | 0.535 |
| HLA-DRB10301 | 59.97 | 58.70 | 61.04 | 0.197 | 0.648 |
| HLA-DRB10401 | 80.67 | 92.38 | 22.13 | 0.180 | 0.536 |
| HLA-DRB10701 | 75.52 | 84.63 | 53.91 | 0.397 | 0.667 |
| HLA-DRB11101 | 71.91 | 86.86 | 41.67 | 0.321 | 0.676 |

Table S31: Performance of CTD method on IEDB-UPDS datasets using 5-fold cross-validation test.

| allele        | ACC   | Sn    | Sp    | CC    | AUC   | binders | Non-binders |
|---------------|-------|-------|-------|-------|-------|---------|-------------|
| HLA-DRB1-0101 | 79.12 | 88.78 | 54.40 | 0.459 | 0.770 | 1105    | 432         |
| HLA-DRB1-0301 | 86.25 | 35.56 | 98.56 | 0.496 | 0.788 | 135     | 556         |
| HLA-DRB1-0401 | 73.94 | 69.72 | 77.18 | 0.469 | 0.790 | 317     | 412         |
| HLA-DRB1-0404 | 75.92 | 73.45 | 78.03 | 0.515 | 0.821 | 113     | 132         |
| HLA-DRB1-0405 | 73.28 | 72.57 | 73.95 | 0.465 | 0.788 | 113     | 119         |
| HLA-DRB1-0701 | 72.08 | 64.91 | 77.48 | 0.427 | 0.757 | 228     | 302         |
| HLA-DRB1-0802 | 74.59 | 56.92 | 84.17 | 0.427 | 0.793 | 65      | 120         |
| HLA-DRB1-1101 | 79.61 | 43.65 | 96.84 | 0.513 | 0.798 | 197     | 411         |
| HLA-DRB1-1302 | 73.73 | 78.29 | 66.99 | 0.454 | 0.775 | 152     | 103         |
| HLA-DRB1-1501 | 71.92 | 71.00 | 72.79 | 0.438 | 0.779 | 269     | 283         |
| HLA-DRB4-0101 | 72.64 | 35.87 | 88.37 | 0.284 | 0.738 | 92      | 215         |
| HLA-DRB5-0101 | 75.84 | 51.16 | 89.92 | 0.456 | 0.785 | 215     | 377         |

Table S32: Performance of CTD method on IEDB-SRDS1 datasets using 5-fold cross-validation test.

| allele        | ACC   | Sn    | Sp    | CC    | AUC   | binders | Non-binders |
|---------------|-------|-------|-------|-------|-------|---------|-------------|
| HLA-DRB1-0101 | 71.74 | 96.12 | 13.06 | 0.169 | 0.604 | 645     | 268         |
| HLA-DRB1-0301 | 81.08 | 28.21 | 95.21 | 0.322 | 0.605 | 78      | 292         |
| HLA-DRB1-0401 | 64.05 | 54.82 | 70.99 | 0.261 | 0.671 | 197     | 262         |
| HLA-DRB1-0404 | 69.82 | 57.97 | 78.00 | 0.367 | 0.703 | 69      | 100         |
| HLA-DRB1-0405 | 61.01 | 58.11 | 63.53 | 0.216 | 0.654 | 74      | 85          |
| HLA-DRB1-0701 | 58.86 | 42.86 | 70.44 | 0.138 | 0.605 | 147     | 203         |
| HLA-DRB1-0802 | 68.03 | 43.48 | 79.21 | 0.235 | 0.692 | 46      | 101         |
| HLA-DRB1-1101 | 68.53 | 39.34 | 84.86 | 0.273 | 0.698 | 122     | 218         |
| HLA-DRB1-1302 | 61.29 | 72.38 | 46.91 | 0.199 | 0.627 | 105     | 81          |
| HLA-DRB1-1501 | 59.82 | 50.30 | 68.75 | 0.194 | 0.623 | 165     | 176         |
| HLA-DRB4-0101 | 67.39 | 7.81  | 99.17 | 0.187 | 0.547 | 64      | 120         |
| HLA-DRB5-0101 | 64.81 | 48.78 | 74.63 | 0.239 | 0.638 | 123     | 201         |

Table S33: Performance of CTD method on IEDB-SRDS2 datasets using 5-fold cross-validation test.

| allele        | ACC   | Sn    | Sp    | CC    | AUC   | binders | Non-binders |
|---------------|-------|-------|-------|-------|-------|---------|-------------|
| HLA-DRB1-0101 | 71.95 | 87.96 | 33.72 | 0.255 | 0.664 | 623     | 261         |
| HLA-DRB1-0301 | 79.42 | 28.99 | 92.03 | 0.257 | 0.673 | 69      | 276         |
| HLA-DRB1-0401 | 64.04 | 55.68 | 69.80 | 0.255 | 0.662 | 176     | 255         |
| HLA-DRB1-0404 | 68.13 | 51.61 | 78.57 | 0.312 | 0.664 | 62      | 98          |
| HLA-DRB1-0405 | 53.90 | 47.14 | 59.52 | 0.067 | 0.576 | 70      | 84          |
| HLA-DRB1-0701 | 61.65 | 48.18 | 70.79 | 0.193 | 0.609 | 137     | 202         |
| HLA-DRB1-0802 | 70.55 | 47.83 | 81.00 | 0.298 | 0.732 | 46      | 100         |
| HLA-DRB1-1101 | 65.94 | 39.64 | 79.72 | 0.207 | 0.666 | 111     | 212         |
| HLA-DRB1-1302 | 59.55 | 60.82 | 58.02 | 0.188 | 0.594 | 97      | 81          |
| HLA-DRB1-1501 | 60.76 | 51.41 | 68.39 | 0.201 | 0.636 | 142     | 174         |
| HLA-DRB4-0101 | 65.38 | 28.57 | 84.87 | 0.161 | 0.644 | 63      | 119         |
| HLA-DRB5-0101 | 62.21 | 13.27 | 90.72 | 0.062 | 0.492 | 113     | 194         |

Table S34: Performance of CTD method on IEDB-SRDS3 datasets using 5-fold cross-validation test.

| allele        | ACC   | Sn    | Sp    | CC    | AUC   | binders | Non-binders |
|---------------|-------|-------|-------|-------|-------|---------|-------------|
| HLA-DRB1-0101 | 76.29 | 88.91 | 43.84 | 0.366 | 0.745 | 938     | 365         |
| HLA-DRB1-0301 | 79.66 | 17.28 | 92.42 | 0.126 | 0.669 | 81      | 396         |
| HLA-DRB1-0401 | 68.83 | 51.16 | 80.00 | 0.325 | 0.730 | 215     | 340         |
| HLA-DRB1-0404 | 67.21 | 52.70 | 77.06 | 0.306 | 0.683 | 74      | 109         |
| HLA-DRB1-0405 | 56.47 | 56.79 | 56.18 | 0.130 | 0.598 | 81      | 89          |
| HLA-DRB1-0701 | 67.79 | 55.49 | 75.55 | 0.314 | 0.714 | 173     | 274         |
| HLA-DRB1-0802 | 68.15 | 38.78 | 81.48 | 0.217 | 0.696 | 49      | 108         |
| HLA-DRB1-1101 | 73.23 | 43.17 | 85.98 | 0.318 | 0.699 | 139     | 328         |
| HLA-DRB1-1302 | 66.83 | 70.91 | 61.96 | 0.330 | 0.686 | 110     | 92          |
| HLA-DRB1-1501 | 63.37 | 53.51 | 70.38 | 0.241 | 0.671 | 185     | 260         |
| HLA-DRB4-0101 | 76.49 | 48.24 | 88.50 | 0.403 | 0.759 | 85      | 200         |
| HLA-DRB5-0101 | 66.67 | 31.97 | 83.17 | 0.172 | 0.644 | 147     | 309         |

Table S35: Performance of CTD method on IEDB-WUPDS datasets using 5-fold cross-validation test.

| allele        | ACC   | Sn    | Sp    | CC    | AUC   |
|---------------|-------|-------|-------|-------|-------|
| HLA-DRB1-0101 | 71.76 | 87.15 | 38.11 | 0.289 | 0.692 |
| HLA-DRB1-0301 | 85.19 | 19.52 | 99.18 | 0.358 | 0.640 |
| HLA-DRB1-0401 | 66.24 | 55.99 | 73.04 | 0.292 | 0.686 |
| HLA-DRB1-0404 | 69.61 | 51.42 | 81.12 | 0.341 | 0.727 |
| HLA-DRB1-0405 | 63.79 | 57.24 | 69.25 | 0.267 | 0.672 |
| HLA-DRB1-0701 | 67.52 | 50.75 | 77.89 | 0.296 | 0.676 |
| HLA-DRB1-0802 | 72.36 | 12.45 | 98.99 | 0.254 | 0.598 |
| HLA-DRB1-1101 | 73.30 | 26.62 | 95.35 | 0.319 | 0.676 |
| HLA-DRB1-1302 | 64.25 | 57.07 | 72.56 | 0.298 | 0.683 |
| HLA-DRB1-1501 | 65.20 | 58.24 | 70.25 | 0.285 | 0.686 |
| HLA-DRB4-0101 | 70.43 | 9.15  | 97.18 | 0.137 | 0.610 |
| HLA-DRB5-0101 | 68.41 | 8.63  | 99.40 | 0.212 | 0.569 |

Table S36: Performance of LA method on IEDB-UPDS datasets using 5-fold cross-validation test.

| allele        | ACC   | Sn    | Sp    | CC    | AUC   | binders | Non-binders |
|---------------|-------|-------|-------|-------|-------|---------|-------------|
| HLA-DRB1-0101 | 78.46 | 91.76 | 44.44 | 0.420 | 0.767 | 1105    | 432         |
| HLA-DRB1-0301 | 81.33 | 29.63 | 93.88 | 0.301 | 0.822 | 135     | 556         |
| HLA-DRB1-0401 | 70.78 | 61.83 | 77.67 | 0.401 | 0.786 | 317     | 412         |
| HLA-DRB1-0404 | 71.43 | 64.60 | 77.27 | 0.423 | 0.763 | 113     | 132         |
| HLA-DRB1-0405 | 70.69 | 65.49 | 75.63 | 0.414 | 0.770 | 113     | 119         |
| HLA-DRB1-0701 | 72.26 | 61.40 | 80.46 | 0.428 | 0.799 | 228     | 302         |
| HLA-DRB1-0802 | 78.92 | 52.31 | 93.33 | 0.520 | 0.896 | 65      | 120         |
| HLA-DRB1-1101 | 74.18 | 46.19 | 87.59 | 0.374 | 0.822 | 197     | 411         |
| HLA-DRB1-1302 | 76.47 | 84.21 | 65.05 | 0.505 | 0.865 | 152     | 103         |
| HLA-DRB1-1501 | 71.38 | 66.91 | 75.62 | 0.427 | 0.781 | 269     | 283         |
| HLA-DRB4-0101 | 78.50 | 50.00 | 90.70 | 0.454 | 0.795 | 92      | 215         |
| HLA-DRB5-0101 | 69.09 | 38.60 | 86.47 | 0.288 | 0.755 | 215     | 377         |

Table S37: Performance of LA method on IEDB-SRDS1 datasets using 5-fold cross-validation test.

| allele        | ACC   | Sn    | Sp    | CC    | AUC   | binders | Non-binders |
|---------------|-------|-------|-------|-------|-------|---------|-------------|
| HLA-DRB1-0101 | 71.52 | 85.89 | 36.94 | 0.256 | 0.628 | 645     | 268         |
| HLA-DRB1-0301 | 78.11 | 28.21 | 91.44 | 0.241 | 0.668 | 78      | 292         |
| HLA-DRB1-0401 | 60.13 | 49.75 | 67.94 | 0.179 | 0.619 | 197     | 262         |
| HLA-DRB1-0404 | 66.86 | 47.83 | 80.00 | 0.295 | 0.644 | 69      | 100         |
| HLA-DRB1-0405 | 59.12 | 48.65 | 68.24 | 0.172 | 0.557 | 74      | 85          |
| HLA-DRB1-0701 | 62.86 | 51.70 | 70.94 | 0.230 | 0.658 | 147     | 203         |
| HLA-DRB1-0802 | 73.47 | 32.61 | 92.08 | 0.315 | 0.762 | 46      | 101         |
| HLA-DRB1-1101 | 63.82 | 31.15 | 82.11 | 0.152 | 0.668 | 122     | 218         |
| HLA-DRB1-1302 | 66.67 | 79.05 | 50.62 | 0.311 | 0.750 | 105     | 81          |
| HLA-DRB1-1501 | 56.01 | 50.91 | 60.80 | 0.118 | 0.595 | 165     | 176         |
| HLA-DRB4-0101 | 64.13 | 39.06 | 77.50 | 0.175 | 0.611 | 64      | 120         |
| HLA-DRB5-0101 | 60.49 | 35.77 | 75.62 | 0.122 | 0.578 | 123     | 201         |

Table S38: Performance of LA method on IEDB-SRDS2 datasets using 5-fold cross-validation test.

| allele        | ACC   | Sn    | Sp    | CC     | AUC   | binders | Non-binders |
|---------------|-------|-------|-------|--------|-------|---------|-------------|
| HLA-DRB1-0101 | 70.93 | 86.36 | 34.10 | 0.235  | 0.629 | 623     | 261         |
| HLA-DRB1-0301 | 76.81 | 13.04 | 92.75 | 0.084  | 0.657 | 69      | 276         |
| HLA-DRB1-0401 | 60.32 | 45.45 | 70.59 | 0.164  | 0.592 | 176     | 255         |
| HLA-DRB1-0404 | 61.25 | 40.32 | 74.49 | 0.156  | 0.578 | 62      | 98          |
| HLA-DRB1-0405 | 55.84 | 45.71 | 64.29 | 0.102  | 0.523 | 70      | 84          |
| HLA-DRB1-0701 | 61.06 | 44.53 | 72.28 | 0.173  | 0.611 | 137     | 202         |
| HLA-DRB1-0802 | 69.86 | 23.91 | 91.00 | 0.201  | 0.732 | 46      | 100         |
| HLA-DRB1-1101 | 62.54 | 32.43 | 78.30 | 0.117  | 0.602 | 111     | 212         |
| HLA-DRB1-1302 | 62.36 | 68.04 | 55.56 | 0.238  | 0.681 | 97      | 81          |
| HLA-DRB1-1501 | 53.48 | 46.48 | 59.20 | 0.057  | 0.534 | 142     | 174         |
| HLA-DRB4-0101 | 63.19 | 30.16 | 80.67 | 0.122  | 0.627 | 63      | 119         |
| HLA-DRB5-0101 | 54.72 | 29.20 | 69.59 | -0.013 | 0.503 | 113     | 194         |



Table S39: Performance of LA method on IEDB-SRDS3 datasets using 5-fold cross-validation test.

| allele        | ACC   | Sn    | Sp    | CC    | AUC   | binders | Non-binders |
|---------------|-------|-------|-------|-------|-------|---------|-------------|
| HLA-DRB1-0101 | 77.36 | 89.45 | 46.30 | 0.397 | 0.754 | 938     | 365         |
| HLA-DRB1-0301 | 81.55 | 18.52 | 94.44 | 0.182 | 0.747 | 81      | 396         |
| HLA-DRB1-0401 | 68.83 | 54.42 | 77.94 | 0.331 | 0.736 | 215     | 340         |
| HLA-DRB1-0404 | 63.93 | 47.30 | 75.23 | 0.234 | 0.655 | 74      | 109         |
| HLA-DRB1-0405 | 60.00 | 55.56 | 64.04 | 0.197 | 0.589 | 81      | 89          |
| HLA-DRB1-0701 | 69.13 | 54.34 | 78.47 | 0.337 | 0.731 | 173     | 274         |
| HLA-DRB1-0802 | 68.15 | 16.33 | 91.67 | 0.119 | 0.732 | 49      | 108         |
| HLA-DRB1-1101 | 72.81 | 35.97 | 88.41 | 0.285 | 0.754 | 139     | 328         |
| HLA-DRB1-1302 | 68.32 | 74.55 | 60.87 | 0.358 | 0.767 | 110     | 92          |
| HLA-DRB1-1501 | 64.94 | 54.59 | 72.31 | 0.272 | 0.712 | 185     | 260         |
| HLA-DRB4-0101 | 76.84 | 50.59 | 88.00 | 0.416 | 0.785 | 85      | 200         |
| HLA-DRB5-0101 | 68.64 | 34.01 | 85.11 | 0.219 | 0.679 | 147     | 309         |

Table S40: Performance of LA method on IEDB-WUPDS datasets using 5-fold cross-validation test.

| allele        | ACC   | Sn    | Sp    | CC    | AUC   |
|---------------|-------|-------|-------|-------|-------|
| HLA-DRB1-0101 | 74.79 | 89.77 | 42.02 | 0.367 | 0.703 |
| HLA-DRB1-0301 | 82.16 | 24.74 | 94.39 | 0.255 | 0.742 |
| HLA-DRB1-0401 | 64.52 | 48.51 | 75.16 | 0.244 | 0.697 |
| HLA-DRB1-0404 | 66.04 | 51.89 | 75.00 | 0.274 | 0.668 |
| HLA-DRB1-0405 | 64.18 | 56.43 | 70.63 | 0.273 | 0.680 |
| HLA-DRB1-0701 | 67.85 | 48.44 | 79.85 | 0.297 | 0.728 |
| HLA-DRB1-0802 | 75.35 | 36.93 | 92.42 | 0.364 | 0.849 |
| HLA-DRB1-1101 | 69.33 | 38.89 | 83.71 | 0.249 | 0.742 |
| HLA-DRB1-1302 | 67.80 | 76.32 | 57.93 | 0.349 | 0.778 |
| HLA-DRB1-1501 | 64.88 | 54.00 | 72.78 | 0.272 | 0.681 |
| HLA-DRB4-0101 | 73.53 | 41.13 | 87.68 | 0.325 | 0.724 |
| HLA-DRB5-0101 | 65.84 | 29.42 | 84.72 | 0.167 | 0.665 |

Table S41: Performance of SVM using 5-spectrum kernel method on IEDB-UPDS datasets using 5-fold cross-validation test.

| allele        | ACC   | Sn    | Sp    | CC    | AUC   | binders | Non-binders |
|---------------|-------|-------|-------|-------|-------|---------|-------------|
| HLA-DRB1-0101 | 80.03 | 92.94 | 46.99 | 0.464 | 0.806 | 1105    | 432         |
| HLA-DRB1-0301 | 80.32 | 59.26 | 85.43 | 0.419 | 0.771 | 135     | 556         |
| HLA-DRB1-0401 | 71.60 | 50.79 | 87.62 | 0.419 | 0.769 | 317     | 412         |
| HLA-DRB1-0404 | 66.94 | 51.33 | 80.30 | 0.332 | 0.639 | 113     | 132         |
| HLA-DRB1-0405 | 68.10 | 47.79 | 87.39 | 0.385 | 0.693 | 113     | 119         |
| HLA-DRB1-0701 | 69.62 | 50.00 | 84.44 | 0.371 | 0.727 | 228     | 302         |
| HLA-DRB1-0802 | 74.05 | 38.46 | 93.33 | 0.396 | 0.703 | 65      | 120         |
| HLA-DRB1-1101 | 76.48 | 52.28 | 88.08 | 0.436 | 0.800 | 197     | 411         |
| HLA-DRB1-1302 | 67.84 | 52.63 | 90.29 | 0.441 | 0.783 | 152     | 103         |
| HLA-DRB1-1501 | 71.74 | 63.20 | 79.86 | 0.437 | 0.794 | 269     | 283         |
| HLA-DRB4-0101 | 59.93 | 81.52 | 50.70 | 0.300 | 0.703 | 92      | 215         |
| HLA-DRB5-0101 | 73.99 | 53.95 | 85.41 | 0.418 | 0.784 | 215     | 377         |

Table S42: Performance of SVM using 5-spectrum kernel method on IEDB-SRDS1 datasets using 5-fold cross-validation test.

| allele        | ACC   | Sn    | Sp    | CC     | AUC   | binders | Non-binders |
|---------------|-------|-------|-------|--------|-------|---------|-------------|
| HLA-DRB1-0101 | 57.28 | 71.63 | 22.76 | -0.058 | 0.427 | 645     | 268         |
| HLA-DRB1-0301 | 75.14 | 24.36 | 88.70 | 0.153  | 0.460 | 78      | 292         |
| HLA-DRB1-0401 | 52.07 | 15.23 | 79.77 | -0.064 | 0.444 | 197     | 262         |
| HLA-DRB1-0404 | 46.15 | 42.03 | 49.00 | -0.088 | 0.411 | 69      | 100         |
| HLA-DRB1-0405 | 45.28 | 4.05  | 81.18 | -0.227 | 0.331 | 74      | 85          |
| HLA-DRB1-0701 | 52.00 | 31.97 | 66.50 | -0.016 | 0.445 | 147     | 203         |
| HLA-DRB1-0802 | 62.59 | 4.35  | 89.11 | -0.107 | 0.378 | 46      | 101         |
| HLA-DRB1-1101 | 59.12 | 13.11 | 84.86 | -0.028 | 0.454 | 122     | 218         |
| HLA-DRB1-1302 | 50.00 | 22.86 | 85.19 | 0.101  | 0.549 | 105     | 81          |
| HLA-DRB1-1501 | 49.85 | 38.18 | 60.80 | -0.010 | 0.460 | 165     | 176         |
| HLA-DRB4-0101 | 57.61 | 10.94 | 82.50 | -0.087 | 0.444 | 64      | 120         |
| HLA-DRB5-0101 | 50.31 | 8.94  | 75.62 | -0.193 | 0.344 | 123     | 201         |

Table S43: Performance of SVM using 5-spectrum kernel method on IEDB-SRDS2 datasets using 5-fold cross-validation test.

| allele        | ACC   | Sn    | Sp    | CC     | AUC   | binders | Non-binders |
|---------------|-------|-------|-------|--------|-------|---------|-------------|
| HLA-DRB1-0101 | 52.49 | 60.67 | 32.95 | -0.060 | 0.436 | 623     | 261         |
| HLA-DRB1-0301 | 64.64 | 26.09 | 74.28 | 0.003  | 0.401 | 69      | 276         |
| HLA-DRB1-0401 | 45.48 | 34.09 | 53.33 | -0.125 | 0.371 | 176     | 255         |
| HLA-DRB1-0404 | 41.25 | 45.16 | 38.78 | -0.157 | 0.364 | 62      | 98          |
| HLA-DRB1-0405 | 47.40 | 5.71  | 82.14 | -0.184 | 0.340 | 70      | 84          |
| HLA-DRB1-0701 | 43.95 | 51.09 | 39.11 | -0.097 | 0.389 | 137     | 202         |
| HLA-DRB1-0802 | 63.01 | 4.35  | 90.00 | -0.096 | 0.370 | 46      | 100         |
| HLA-DRB1-1101 | 57.89 | 4.50  | 85.85 | -0.147 | 0.399 | 111     | 212         |
| HLA-DRB1-1302 | 47.75 | 25.77 | 74.07 | -0.002 | 0.483 | 97      | 81          |
| HLA-DRB1-1501 | 44.94 | 36.62 | 51.72 | -0.117 | 0.380 | 142     | 174         |
| HLA-DRB4-0101 | 59.89 | 11.11 | 85.71 | -0.045 | 0.466 | 63      | 119         |
| HLA-DRB5-0101 | 47.23 | 2.65  | 73.20 | -0.304 | 0.278 | 113     | 194         |

Table S44: Performance of SVM using 5-spectrum kernel method on IEDB-SRDS3 datasets using 5-fold cross-validation test.

| allele        | ACC   | Sn    | Sp    | CC     | AUC   | binders | Non-binders |
|---------------|-------|-------|-------|--------|-------|---------|-------------|
| HLA-DRB1-0101 | 76.44 | 91.90 | 36.71 | 0.349  | 0.742 | 938     | 365         |
| HLA-DRB1-0301 | 73.58 | 29.63 | 82.58 | 0.116  | 0.590 | 81      | 396         |
| HLA-DRB1-0401 | 59.46 | 39.07 | 72.35 | 0.119  | 0.593 | 215     | 340         |
| HLA-DRB1-0404 | 48.09 | 56.76 | 42.20 | -0.010 | 0.544 | 74      | 109         |
| HLA-DRB1-0405 | 51.76 | 18.52 | 82.02 | 0.007  | 0.414 | 81      | 89          |
| HLA-DRB1-0701 | 61.30 | 37.57 | 76.28 | 0.149  | 0.628 | 173     | 274         |
| HLA-DRB1-0802 | 67.52 | 14.29 | 91.67 | 0.091  | 0.515 | 49      | 108         |
| HLA-DRB1-1101 | 63.38 | 59.71 | 64.94 | 0.228  | 0.673 | 139     | 328         |
| HLA-DRB1-1302 | 57.43 | 30.91 | 89.13 | 0.242  | 0.669 | 110     | 92          |
| HLA-DRB1-1501 | 62.92 | 76.22 | 53.46 | 0.297  | 0.681 | 185     | 260         |
| HLA-DRB4-0101 | 61.75 | 68.24 | 59.00 | 0.249  | 0.699 | 85      | 200         |
| HLA-DRB5-0101 | 64.25 | 27.89 | 81.55 | 0.107  | 0.591 | 147     | 309         |

Table S45: Performance of SVM using 5-spectrum kernel method on IEDB-WUPDS datasets using 5-fold cross-validation test.

| allele        | ACC   | Sn    | Sp    | CC    | AUC   |
|---------------|-------|-------|-------|-------|-------|
| HLA-DRB1-0101 | 72.61 | 93.49 | 26.94 | 0.283 | 0.685 |
| HLA-DRB1-0301 | 82.67 | 27.54 | 94.41 | 0.285 | 0.715 |
| HLA-DRB1-0401 | 55.54 | 45.29 | 62.35 | 0.076 | 0.601 |
| HLA-DRB1-0404 | 55.42 | 52.69 | 57.14 | 0.096 | 0.551 |
| HLA-DRB1-0405 | 59.46 | 36.29 | 78.77 | 0.167 | 0.604 |
| HLA-DRB1-0701 | 59.19 | 53.00 | 63.01 | 0.157 | 0.609 |
| HLA-DRB1-0802 | 49.86 | 65.45 | 42.93 | 0.079 | 0.582 |
| HLA-DRB1-1101 | 70.49 | 30.67 | 89.30 | 0.247 | 0.666 |
| HLA-DRB1-1302 | 56.06 | 66.73 | 43.70 | 0.107 | 0.586 |
| HLA-DRB1-1501 | 63.34 | 44.78 | 76.82 | 0.228 | 0.670 |
| HLA-DRB4-0101 | 67.20 | 52.95 | 73.42 | 0.255 | 0.665 |
| HLA-DRB5-0101 | 62.21 | 29.56 | 79.14 | 0.097 | 0.618 |

Table S46: AUC values for the three prediction methods evaluated on IEDB-UPDS datasets. For each dataset, the rank of each classifier is shown in parentheses.

| allele        | 5-spectrum  | LA          | CTD         |
|---------------|-------------|-------------|-------------|
| HLA-DRB1-0101 | 0.806(1)    | 0.767(3)    | 0.770(2)    |
| HLA-DRB1-0301 | 0.771(3)    | 0.822(1)    | 0.788(2)    |
| HLA-DRB1-0401 | 0.769(3)    | 0.786(2)    | 0.790(1)    |
| HLA-DRB1-0404 | 0.639(3)    | 0.763(2)    | 0.821(1)    |
| HLA-DRB1-0405 | 0.693(3)    | 0.770(2)    | 0.788(1)    |
| HLA-DRB1-0701 | 0.727(3)    | 0.799(1)    | 0.757(2)    |
| HLA-DRB1-0802 | 0.703(3)    | 0.896(1)    | 0.793(2)    |
| HLA-DRB1-1101 | 0.800(2)    | 0.822(1)    | 0.798(3)    |
| HLA-DRB1-1302 | 0.783(2)    | 0.865(1)    | 0.775(3)    |
| HLA-DRB1-1501 | 0.794(1)    | 0.781(2)    | 0.779(3)    |
| HLA-DRB4-0101 | 0.703(3)    | 0.795(1)    | 0.738(2)    |
| HLA-DRB5-0101 | 0.784(2)    | 0.755(3)    | 0.785(1)    |
| Average       | 0.748(2.42) | 0.802(1.67) | 0.782(1.92) |

Table S47: AUC values for the three prediction methods evaluated on IEDB-SRDS1 datasets. For each dataset, the rank of each classifier is shown in parentheses.

| allele        | 5-spectrum | LA         | CTD        |
|---------------|------------|------------|------------|
| HLA-DRB1-0101 | 0.427(3)   | 0.628(1)   | 0.604(2)   |
| HLA-DRB1-0301 | 0.460(3)   | 0.668(1)   | 0.605(2)   |
| HLA-DRB1-0401 | 0.444(3)   | 0.619(2)   | 0.671(1)   |
| HLA-DRB1-0404 | 0.411(3)   | 0.644(2)   | 0.703(1)   |
| HLA-DRB1-0405 | 0.331(3)   | 0.557(2)   | 0.654(1)   |
| HLA-DRB1-0701 | 0.445(3)   | 0.658(1)   | 0.605(2)   |
| HLA-DRB1-0802 | 0.378(3)   | 0.762(1)   | 0.692(2)   |
| HLA-DRB1-1101 | 0.454(3)   | 0.668(2)   | 0.698(1)   |
| HLA-DRB1-1302 | 0.549(3)   | 0.750(1)   | 0.627(2)   |
| HLA-DRB1-1501 | 0.460(3)   | 0.595(2)   | 0.623(1)   |
| HLA-DRB4-0101 | 0.444(3)   | 0.611(1)   | 0.547(2)   |
| HLA-DRB5-0101 | 0.344(3)   | 0.578(2)   | 0.638(1)   |
| Average       | 0.429(3)   | 0.645(1.5) | 0.639(1.5) |

Table S48: AUC values for the three prediction methods evaluated on IEDB-SRDS2 datasets. For each dataset, the rank of each classifier is shown in parentheses.

| allele        | 5-spectrum | LA          | CTD         |
|---------------|------------|-------------|-------------|
| HLA-DRB1-0101 | 0.436(3)   | 0.629(2)    | 0.664(1)    |
| HLA-DRB1-0301 | 0.401(3)   | 0.657(2)    | 0.673(1)    |
| HLA-DRB1-0401 | 0.371(3)   | 0.592(2)    | 0.662(1)    |
| HLA-DRB1-0404 | 0.364(3)   | 0.578(2)    | 0.664(1)    |
| HLA-DRB1-0405 | 0.340(3)   | 0.523(2)    | 0.576(1)    |
| HLA-DRB1-0701 | 0.389(3)   | 0.611(1)    | 0.609(2)    |
| HLA-DRB1-0802 | 0.370(3)   | 0.732(1.5)  | 0.732(1.5)  |
| HLA-DRB1-1101 | 0.399(3)   | 0.602(2)    | 0.666(1)    |
| HLA-DRB1-1302 | 0.483(3)   | 0.681(1)    | 0.594(2)    |
| HLA-DRB1-1501 | 0.380(3)   | 0.534(2)    | 0.636(1)    |
| HLA-DRB4-0101 | 0.466(3)   | 0.627(2)    | 0.644(1)    |
| HLA-DRB5-0101 | 0.278(3)   | 0.503(1)    | 0.492(2)    |
| Average       | 0.390(3)   | 0.606(1.71) | 0.634(1.29) |

Table S49: AUC values for the three prediction methods evaluated on IEDB-SRDS3 datasets. For each dataset, the rank of each classifier is shown in parentheses.

| allele        | 5-spectrum  | LA          | CTD         |
|---------------|-------------|-------------|-------------|
| HLA-DRB1-0101 | 0.742(3)    | 0.754(1)    | 0.745(2)    |
| HLA-DRB1-0301 | 0.590(3)    | 0.747(1)    | 0.669(2)    |
| HLA-DRB1-0401 | 0.593(2)    | 0.736(1)    | 0.730(2)    |
| HLA-DRB1-0404 | 0.544(3)    | 0.655(2)    | 0.683(1)    |
| HLA-DRB1-0405 | 0.414(3)    | 0.589(2)    | 0.598(1)    |
| HLA-DRB1-0701 | 0.628(3)    | 0.731(1)    | 0.714(2)    |
| HLA-DRB1-0802 | 0.515(3)    | 0.732(1)    | 0.696(2)    |
| HLA-DRB1-1101 | 0.673(3)    | 0.754(1)    | 0.699(2)    |
| HLA-DRB1-1302 | 0.669(3)    | 0.767(1)    | 0.686(2)    |
| HLA-DRB1-1501 | 0.681(2)    | 0.712(1)    | 0.671(3)    |
| HLA-DRB4-0101 | 0.699(3)    | 0.785(1)    | 0.759(2)    |
| HLA-DRB5-0101 | 0.591(3)    | 0.679(1)    | 0.644(2)    |
| Average       | 0.612(2.83) | 0.720(1.17) | 0.691(1.92) |

Table S50: AUC values for the three prediction methods evaluated on IEDB-WUPDS datasets. For each dataset, the rank of each classifier is shown in parentheses.

| allele        | 5-spectrum  | LA          | CTD         |
|---------------|-------------|-------------|-------------|
| HLA-DRB1-0101 | 0.685(3)    | 0.703(1)    | 0.692(2)    |
| HLA-DRB1-0301 | 0.715(2)    | 0.742(1)    | 0.640(3)    |
| HLA-DRB1-0401 | 0.601(3)    | 0.697(1)    | 0.686(2)    |
| HLA-DRB1-0404 | 0.551(3)    | 0.668(2)    | 0.727(1)    |
| HLA-DRB1-0405 | 0.604(3)    | 0.680(1)    | 0.672(2)    |
| HLA-DRB1-0701 | 0.609(3)    | 0.728(1)    | 0.676(2)    |
| HLA-DRB1-0802 | 0.582(3)    | 0.849(1)    | 0.598(2)    |
| HLA-DRB1-1101 | 0.666(3)    | 0.742(1)    | 0.676(2)    |
| HLA-DRB1-1302 | 0.586(3)    | 0.778(1)    | 0.683(2)    |
| HLA-DRB1-1501 | 0.670(3)    | 0.681(2)    | 0.686(1)    |
| HLA-DRB4-0101 | 0.665(2)    | 0.724(1)    | 0.610(3)    |
| HLA-DRB5-0101 | 0.618(2)    | 0.665(1)    | 0.569(3)    |
| Average       | 0.629(2.75) | 0.721(1.17) | 0.660(2.08) |
